# Supplementary material for: Comparative analysis of the genomes of Stylophora pistillata and Acropora digitifera provides evidence for extensive differences between species of corals
Source: PubMed Central journal article supplement (PMC5730576; doi:10.1038/s41598-017-17484-x), 2017-12-14
Supplement: 41598_2017_17484_MOESM1_ESM.pdf [file 41598_2017_17484_MOESM1_ESM.pdf]

## Supplementary Information

### **Comparative analysis of the genomes of *Stylophora pistillata* and *Acropora digitifera* provides evidence for extensive differences between species of corals**

Christian R Voolstra<sup>1,\*</sup>, Yong Li<sup>1</sup>, Yi Jin Liew<sup>1</sup>, Sebastian Baumgarten<sup>1+</sup>, Didier Zoccola<sup>2</sup>, Jean-François Flot<sup>3</sup>, Sylvie Tambutte<sup>2</sup>, Denis Allemand<sup>2</sup>, Manuel Aranda<sup>1,\*</sup>

<sup>1</sup>Red Sea Research Center, Division of Biological and Environmental Science and Engineering (BESE), King Abdullah University of Science and Technology (KAUST), Thuwal, Saudi Arabia

<sup>2</sup>Centre Scientifique de Monaco, 8 quai Antoine Ier, Monaco, 98000, Monaco

<sup>3</sup>Université libre de Bruxelles, Avenue Franklin Roosevelt 50, 1050 Bruxelles, Belgium

<sup>+</sup>Current address: Biology of Host-Parasite Interactions Unit, Institut Pasteur, 25 rue du Dr Roux, 75015 Paris, France

\*Corresponding Authors:

christian.voolstra@kaust.edu.sa

Tel: +966 12 8082377, Fax: +966 21 8082377

manuel.aranda@kaust.edu.sa

Tel: +966 12 8082979, Fax: +966 21 8082979

**Short title:** Extensive differences between coral genomes

**Keywords:** Coral Reef, Adaptive Evolution, Genome Sequencing, Scleractinia, Environmental Change, *Stylophora pistillata*, *Acropora digitifera*

## Supplemental Tables

**Table S1.** Assembly statistics for the *Stylophora pistillata* genome assembly.

---

|                                             |  |                |
|---------------------------------------------|--|----------------|
| Overview statistics                         |  |                |
| Genome size (FACS)                          |  | 434 Mbp        |
| Genome size (ALLPATHS-LG)                   |  | 433 Mbp        |
| Total size of scaffolds                     |  | 400,108,361 bp |
| Number of scaffolds                         |  | 5,688          |
| N50 scaffold length                         |  | 457,453 bp     |
| Total size of contigs                       |  | 358,078,850 bp |
| Number of contigs                           |  | 32,144         |
| N50 contig length                           |  | 24,388 bp      |
| Average length of gaps (for gaps of >25 Ns) |  | 1,589          |
| Scaffold statistics                         |  |                |
| Longest scaffold                            |  | 2,969,787 bp   |
| Shortest scaffold                           |  | 891 bp         |
| Number of scaffolds >1 kb                   |  | 5,565          |
| Number of scaffolds >10 kb                  |  | 2,276          |
| Number of scaffolds >100 kb                 |  | 857            |
| Number of scaffolds >1 Mb                   |  | 59             |
| Mean scaffold size                          |  | 70,343 bp      |
| Median scaffold size                        |  | 4,680 bp       |
| Contig statistics                           |  |                |
| Longest contig                              |  | 252,210 bp     |
| Number of contigs >1 kb                     |  | 31,587         |
| Number of contigs >10 kb                    |  | 10,373         |
| Number of contigs >100 kb                   |  | 104            |
| Mean contig size                            |  | 11,140 bp      |
| Median contig size                          |  | 5,088 bp       |

---

**Table S2.** Annotation statistics for the *Stylophora pistillata* gene models.

|                                                                                              |               |            |
|----------------------------------------------------------------------------------------------|---------------|------------|
| Total number of gene models                                                                  | 25,769        | 100%       |
| <b>Total number of gene models with associated GO terms based on all UniProt annotations</b> | <b>21,446</b> | <b>83%</b> |
| Number of gene models with associated GO terms based on SwissProt annotations                | 17,506        | 68%        |
| Number of gene models with associated GO terms based on TrEMBL annotations                   | 3,940         | 15%        |
| <b>Number of remaining gene models annotated against nr database</b>                         | <b>1,466</b>  | <b>6%</b>  |
| Number of gene models with KEGG annotations                                                  | 12,623        | 49%        |
| Number of gene models with PANTHER annotations                                               | 19,751        | 77%        |
| Number of gene models with Pfam domains                                                      | 17,951        | 70%        |

**Table S3.** No. of Core Eukaryotic Genes (CEGs) identified with CEGMA analysis in the genomes of the corals *Stylophora pistillata* (this study) and *Acropora digitifera* (Shinzato *et al.* 2011).

| <b>No. of CEGs</b> | <b><i>Stylophora pistillata</i></b> | <b><i>Acropora digitifera</i></b> |
|--------------------|-------------------------------------|-----------------------------------|
| 248                | 235                                 | 204                               |
| %                  | 94.76                               | 82.26                             |

**Table S4.** Sequencing libraries and NCBI accession numbers (PRJNA281535) used for *S. pistillata* genome assembly and gap filling. Library abbreviations are as follows: pe = paired-end, mp = mate-pair.

| Library code | NCBI SRA accession no. | Insert size | No. of sequence reads before filtering | No. of sequences reads after filtering | Used for assembly | Used for Gap filling |
|--------------|------------------------|-------------|----------------------------------------|----------------------------------------|-------------------|----------------------|
| pe06         | SRX999654              | 190bp       | 136,879,629                            | 122,574,751                            | +                 | +                    |
| pe07         | SRX999933              | 190bp       | 134,613,054                            | 122,295,744                            | +                 | +                    |
| pe18         | SRX999934              | 200bp       | 151,771,736                            | 142,887,569                            | +                 | +                    |
| pe19         | SRX999935              | 200bp       | 54,003,303                             | 51,957,308                             | +                 | +                    |
| miseq        | SRX999949              | 400bp       | 14,970,181                             | 14,133,302                             |                   | +                    |
| mp01         | SRX999936              | 3kb         | 34,282,529                             | 18,555,836                             | +                 | +                    |
| mp02         | SRX999939              | 5kb         | 21,433,929                             | 16,296,876                             |                   | +                    |
| mp03         | SRX999941              | 8kb         | 18,535,761                             | 12,906,205                             |                   | +                    |
| mp04         | SRX999942              | 3kb         | 88,066,688                             | 64,606,537                             | +                 | +                    |
| mp05         | SRX999943              | 3kb         | 207,104,853                            | 195,072,501                            |                   | +                    |
| mp06         | SRX999944              | 6.2kb       | 38,432,387                             | 20,922,528                             | +                 | +                    |
| mp07         | SRX999945              | 7.8kb       | 38,172,153                             | 19,473,493                             |                   | +                    |
| mp08         | SRX999947              | 10kb        | 36,477,254                             | 18,813,296                             |                   | +                    |
| mp09         | SRX999948              | 11kb        | 44,567,883                             | 23,523,074                             | +                 | +                    |

**Table S5.** *Stylophora pistillata* genome repeat content.

| Element <sup>a</sup>         | Number of occurrences <sup>b</sup> | Number of bp covered <sup>b</sup> |
|------------------------------|------------------------------------|-----------------------------------|
| <b>DNA Transposon</b>        | <b>27,594</b>                      | <b>7,285,572</b>                  |
| MuDR                         | 290                                | 42,694                            |
| Tc2                          | 1                                  | 105                               |
| EnSpm                        | 2,235                              | 502,539                           |
| Mirage                       | 1                                  | 41                                |
| Mariner                      | 3,396                              | 522,041                           |
| Crypton                      | 2,053                              | 382,267                           |
| Rehavirus                    | 2                                  | 83                                |
| Polinton                     | 3,683                              | 1,530,027                         |
| Sola                         | 2,024                              | 657,414                           |
| Tc1                          | 2                                  | 101                               |
| Charlie                      | 1                                  | 48                                |
| Helitron                     | 1,121                              | 322,541                           |
| ISL2EU                       | 1,993                              | 412,054                           |
| P                            | 1,026                              | 309,099                           |
| Merlin                       | 827                                | 160,993                           |
| hAT                          | 2,239                              | 453,296                           |
| Harbinger                    | 2,358                              | 626,912                           |
| Kolobok                      | 782                                | 311,592                           |
| Chapaev                      | 62                                 | 18,491                            |
| PiggyBac                     | 201                                | 83,943                            |
| Novosib                      | 576                                | 20,020                            |
| IS4                          | 2,716                              | 928,984                           |
| Transib                      | 5                                  | 287                               |
| <b>LTR Retrotransposon</b>   | <b>14,223</b>                      | <b>4,722,973</b>                  |
| DIRS                         | 2,637                              | 800,713                           |
| ROO                          | 2                                  | 185                               |
| Copia                        | 874                                | 89,153                            |
| BEL                          | 3,574                              | 1,341,375                         |
| Troyka                       | 85                                 | 38,236                            |
| Gypsy                        | 11,722                             | 953,269                           |
| <b>Other transposons</b>     | <b>95,987</b>                      | <b>5,998,951</b>                  |
| Other                        | 95,987                             | 5,998,951                         |
| <b>snRNA</b>                 | <b>20</b>                          | <b>2,169</b>                      |
| snRNA                        | 20                                 | 2,169                             |
| <b>Endogenous Retrovirus</b> | <b>433</b>                         | <b>28,758</b>                     |
| ERV                          | 433                                | 28,758                            |
| <b>Other</b>                 | <b>21,765</b>                      | <b>5,987,069</b>                  |
| Satellite                    | 292                                | 23,500                            |
| Other transposons            | 21,473                             | 5,963,569                         |
| <b>rRNA</b>                  | <b>957</b>                         | <b>54,960</b>                     |
| SSU-rRNA                     | 84                                 | 21,669                            |

|                                 |                   |                   |
|---------------------------------|-------------------|-------------------|
| rRNA                            | 873               | 33,291            |
| <b>Non-LTR Retrotransposon</b>  | <b>96,263</b>     | <b>21,946,293</b> |
| Proto                           | 10                | 487               |
| Crack                           | 3,041             | 707,173           |
| Penelope                        | 30,419            | 5,797,599         |
| R1                              | 21                | 839               |
| Nematis                         | 44                | 10,945            |
| Loa                             | 4                 | 196               |
| RTEX                            | 27                | 5,254             |
| Rex                             | 2,391             | 765,528           |
| CRE                             | 2,204             | 634,127           |
| Jockey                          | 84                | 15,006            |
| L1                              | 913               | 280,818           |
| Ingi                            | 6                 | 382               |
| L2                              | 4,781             | 1,265,995         |
| RTE                             | 2,215             | 633,292           |
| Nimbus                          | 2                 | 143               |
| 7SL                             | 2                 | 629               |
| Outcast                         | 1                 | 94                |
| Perere                          | 4,004             | 985,433           |
| Tad1                            | 14                | 771               |
| Tx1                             | 738               | 327,507           |
| SINE                            | 11,414            | 1,744,733         |
| R4                              | 106               | 19,675            |
| Neptune                         | 552               | 81,827            |
| Daphne                          | 3,346             | 923,130           |
| Poseidon                        | 6,072             | 1,425,311         |
| Hero                            | 10                | 2,268             |
| I                               | 13                | 719               |
| CR1                             | 23,748            | 6,296,981         |
| R2                              | 81                | 19,431            |
| <b>tRNA</b>                     | <b>28,324</b>     | <b>3,981,121</b>  |
| tRNA                            | 28,324            | 3,981,121         |
| <b>Unclassified<sup>c</sup></b> | <b>67,853,343</b> | <b>67,853,343</b> |
| <b>Low complexity</b>           | <b>47,807</b>     | <b>9,252,804</b>  |
| Other low complexity            | 6,574             | 1,609,158         |
| Simple repeat                   | 41,233            | 7,643,646         |

<sup>a</sup> Categories of elements are indicated in **bold**.

<sup>b</sup> Subtotals for the respective categories indicated in **bold**.

<sup>c</sup> Previously described, but poorly defined repetitive elements.

## Supplemental Figures

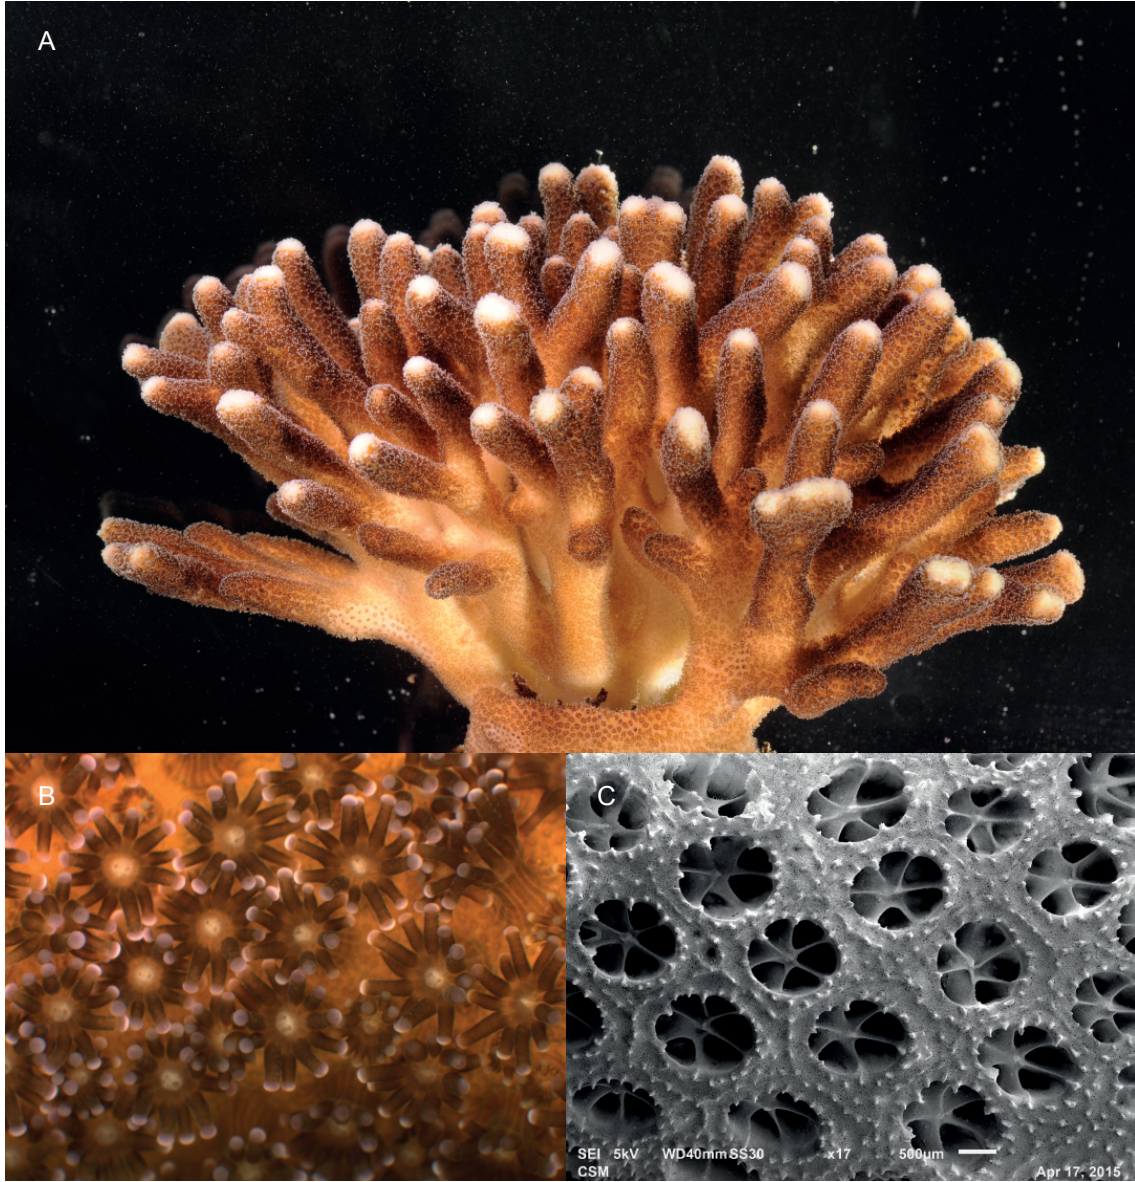

**Fig. S1.** *Stylophora pistillata* (Esper 1797), clade 4 *sensu* Keshavmurthy *et al.* (2013) (A) Picture of colony in the aquarium at the Centre Scientifique de Monaco (CSM). (B) Magnification of coral polyps. (C) Skeletal corallite structure, scale bar at 500  $\mu\text{m}$ . Pictures kindly provided by E. Tambutté, CSM.



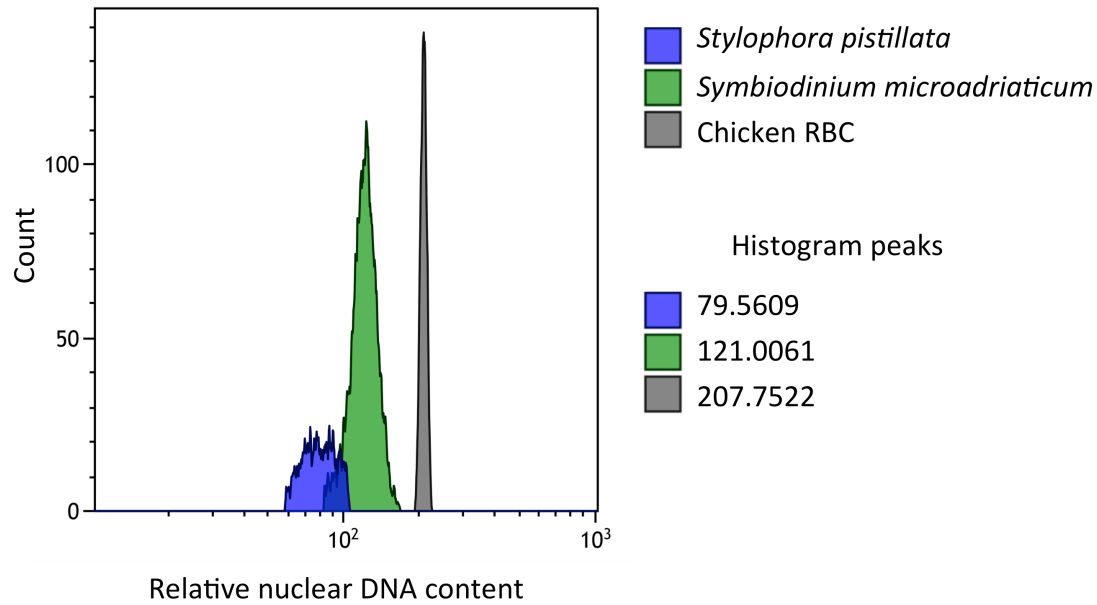

**Fig. S2. FACS estimate of the *Stylophora pistillata* genome size.** Flow cytometry DNA histograms were obtained with fresh, non-fixed *S. pistillata* cells and mixed with chicken erythrocytes as a reference. The count profile of the Fluorescence-activated cell sorting (FACS) shows three peaks, representing propidium-iodide-stained nuclei of reference chicken erythrocytes (grey), *S. pistillata* (blue), and associated algal symbionts that were not removed from the preparation (*Symbiodinium microadriaticum*, green). Given the known chicken erythrocytes 2C DNA content of 2.33 pg, the haploid DNA content of *S. pistillata* is estimated to be 0.446 pg or ~434 Mbp, while the haploid *S. microadriaticum* genome is estimated to be 1.36 pg or 1,332 Mbp.

## Supplemental Datasets

**Dataset S1. One-to-one orthologs.**

**Dataset S2. Many-to-one and many-to-many orthologs.**

**Dataset S3. Gene Ontology Enrichment of one-to-one orthologs for *S. pistillata* and *A. digitifera*.** Only significantly enriched processes ( $p < 0.05$ ) are shown.

**Dataset S4. One-to-one orthologs displaying  $\geq 50\%$ , between  $< 50\%$  and  $\geq 30\%$ , and those displaying  $< 30\%$  pairwise sequence similarity.**

**Dataset S5. Gene Ontology Enrichment (Biological Process) of many-to-one and many-to-many ortholog for *S. pistillata* and *A. digitifera*.** Only significantly enriched processes ( $p < 0.05$ ) are shown.

**Dataset S6. Gene expansion of ortholog groups in *S. pistillata* and *A. digitifera* ( $n \geq 3$ ).**

**Dataset S7. Species-specific gene expansions of ortholog groups in *S. pistillata* and *A. digitifera* ( $n \geq 3$ ).**

**Dataset S8. Summary table for best hit of each *S. pistillata* gene model vs. SwissProt/TrEMBL/nr.** 25,769 genes in total; of which 17,506 have hits to Swiss-Prot, 3,940 to TrEMBL, and 1,466 to nr. 2,857 have no hits to all three databases. E-value cutoff set at  $1e-5$ ; Swiss-Prot and TrEMBL hits have at least one GO term assigned to them.

**Dataset S9. Summary table for best hit of each *A. digitifera* gene model vs. SwissProt/TrEMBL/nr.** 23,523 genes in total; of which 16,024 have hits to Swiss-Prot, 2,519 to TrEMBL, and 1,428 to nr. 3,551 have no hits to all three databases. E-value cutoff set at  $1e-5$ ; Swiss-Prot and TrEMBL hits have at least one GO term assigned to them.

## Supplemental References

Keshavmurthy S, Yang S-Y, Alamaru A, *et al.* (2013) DNA barcoding reveals the coral “laboratory-rat”, *Stylophora pistillata* encompasses multiple identities. *Scientific Reports* **3**, 1520.

Shinzato C, Shoguchi E, Kawashima T, *et al.* (2011) Using the *Acropora digitifera* genome to understand coral responses to environmental change. *Nature* **476**, 320-323.
